# Supplementary material
Source: PubMed Central journal article supplement (PMC10655957)
Supplement: NIHMS1730700-supplement-Supplementary_material.pdf [file NIHMS1730700-supplement-Supplementary_material.pdf]

1  
2  
3  
4  
5  
6  
7  
8  
9  
10  
11  
12  
13  
14  
15  
16  
17  
18  
19  
20  
21  
22

**SUPPLEMENTAL INFORMATION**

**Pollutant-induced local alteration of vitamin D metabolism enhances IgE sensitization in  
the gut**

Eunsoo Kim<sup>1</sup>, Astrid Bonnegarde-Bernard<sup>1</sup>, Stephen O. Opiyo<sup>2</sup>, Marisa R. Joldrichsen<sup>1</sup>,  
Zayed Attia<sup>1</sup>, Brian H. Ahmer<sup>3</sup>, Estelle Cormet-Boyaka<sup>1</sup>, and Prosper N. Boyaka<sup>1,4</sup>

*<sup>1</sup>Department of Veterinary Biosciences, <sup>2</sup>Molecular, Cellular Imaging Center-Columbus,  
<sup>3</sup> Department of Microbial Infection and Immunity, and <sup>4</sup>Infection Diseases Institute,  
The Ohio State University, Columbus, OH, USA*

**Address correspondence:** Prosper N. Boyaka, The Ohio State University, Dept. of  
Veterinary Biosciences, VMAB, 1900 Coffey Road, Columbus, OH 43210. Telephone #  
(614) 247-4671; Fax #: (614) 292-6473; Email: [boyaka.1@osu.edu](mailto:boyaka.1@osu.edu)

## 23 **EXTENDED MATERIALS AND METHODS**

24 **Mice.** Conventional specific pathogen-free (SPF) C57BL/6 mice were obtained from Jackson  
25 Laboratory (Bar Harbor, ME) and maintained under specific pathogen-free conditions at the Ohio  
26 State University animal care facility. Germ-free C57BL/6 mice were obtained by cesarean  
27 derivation and maintained in sterile isolators. The Verigem IgE reporter (IgE GFP) mice were  
28 obtained from Dr. Christopher Allen (University of California at San Francisco) and were  
29 maintained in our vivarium under SFP condition. All animal experiments were approved by the  
30 OSU Animal Care and Use Committee and followed the federal guidelines to avoid unnecessary  
31 pain and distress and to minimize animal suffering during the course of the studies.

32  
33 **Cells.** The following lines of murine macrophages were obtained from BEI resources (Manassas,  
34 VA): J774 cells, wild-type C57BL/6, Myd88 KO C57BL/6 and Trif/Tram double-KO C57BL/6  
35 macrophages. The human intestinal epithelial cell line HT29 clone 19A is a permanently  
36 differentiated sub-clone derived from the adenocarcinoma cell line HT29 after sodium butyrate  
37 treatment (1) (ATCC, Manassas, VA).

38  
39 **Exposure of mice to subtoxic doses of Cd *in vivo*.** Mice aged 8–12 weeks received cadmium  
40 chloride (CdCl<sub>2</sub>, MW = 183.3; Sigma-Aldrich, St. Louis, MO) in drinking water for 4 weeks. The  
41 concentration of Cd used in our study (2 ppm or 5 ppm) are approximately 10 times higher than  
42 average daily dose people are exposed to in the US. Thus, the average 8-35 µg/day/kg reported by  
43 Jarup et al (2)., would equate to 0.16-0.7 µg/day/20g in mice. Since in our study the water  
44 consumption per mouse was 2.8 mL/day that would be to equivalent 57-250 ppb [or (0.16-  
45 0.7(µg/day)/2.8(mL/day) = 57-250 ng/mL]. Thus, the amount of Cd used in our study could reflect  
46 the result of years of chronic exposure of average human. Or shorter exposure by smokers or

47 people living in Cd polluted area (e.g., mining areas). Therefore, Cd was given at the  
48 environmentally relevant doses of 10  $\mu$ M (Cd10) or 25  $\mu$ M (Cd25) (equivalent to 2 or 5 ppm  
49 ( $\mu$ g/L), based on previous studies (3).

50  
51 **Allergen sensitization and allergen challenge.** Mice were sensitized by intragastric gavage on  
52 days 0 and 7. Briefly, mice were deprived of food for 2 h and given 250  $\mu$ l of sodium bicarbonate  
53 30 min before intragastric gavage of 1 mg of ovalbumin (OVA) and 15  $\mu$ g cholera toxin in 250  $\mu$ L  
54 of phosphate-buffered saline (PBS). Blood samples were collected on day 14 for analysis of serum  
55 IgE and other immunoglobulin isotypes. Nasal antigen challenges were performed on days 15, 16,  
56 and 19. For this purpose, mice were anesthetized by intraperitoneal injection of ketamine/xylazine  
57 and administered 200  $\mu$ g of OVA in PBS 100  $\mu$ L. The body temperature of challenge mice was  
58 measured on the skin with a digital thermometer (Heat Spy infrared thermal imaging camera,  
59 Wahl, Culver City, CA) to assess the hypothermia associated with allergic responses.

60  
61 **Allergen-specific serum IgG and IgA Ab responses.** To determine OVA-specific antibody titers,  
62 ELISA was performed with OVA-coated plates as described previously (4, 5). Briefly, microtiter  
63 plates were coated with OVA (1 mg/mL). For detection of OVA-specific IgG and IgA Abs, serial  
64 dilutions of serum or fecal material extract were added to the plates and the binding antibodies  
65 were detected with HRP-conjugated anti-mouse  $\gamma$ - or  $\alpha$ -heavy chain-specific antisera (Southern  
66 Biotech Associates Inc., Birmingham, AL). Biotin-conjugated rat anti-mouse IgG1, IgG2a/c,  
67 IgG2b, or IgG3 monoclonal Abs (mAbs) and HRP-conjugated streptavidin (BD Bioscience, San  
68 Jose, CA) were used to measure IgG subclass responses. The Ab titers were determined as the last  
69 dilutions of samples that with an absorbance of  $>0.1$  above that of control samples from naïve  
70 mice.

71

72 **Analysis of total and allergen-specific serum IgE Ab responses.** Total IgE Ab levels were  
73 determined by a BD OptEIA Set Mouse IgE, (BD PharMingen) according to instructions from the  
74 manufacturer. To prevent interference of IgG in the assay, serial dilutions of immune plasma were  
75 previously depleted of IgG by overnight incubation in Reacti-Bind Protein G Coated Plates  
76 (Pierce, Rockford, IL). In order to detect antigen-specific IgE, the microtiter plates were coated  
77 with OVA (1 mg/mL). Serial dilutions of IgG-depleted plasma were then added and IgE were  
78 detected with a biotinylated anti-mouse IgE Ab (BD Biosciences). The IgE titers were determined  
79 as described above for IgG and IgA.

80

81 **Analysis of antigen-specific T helper cell cytokines.** Antigen-specific T helper cell cytokine  
82 responses were analyzed by flow cytometry after *in vitro* restimulation and intracellular staining  
83 with cytokine-specific fluorescent antibodies. Briefly, splenocytes were collected on day 14 after  
84 two intraperitoneal sensitizations on day 0 and 7. Cells were restimulated with antigen (i.e., 1 mg/  
85 mL OVA) *in vitro* as previously described (4). After 5 days culture, cells were subjected to  
86 extracellular staining with lineage-specific antibodies [i.e., anti-CD3 (Clone: 17A2), and anti-CD4  
87 (Clone: BL25168) (Biolegend, San Diego, CA)], and after fixation, to intracellular staining using  
88 Th1 (IFN $\gamma$  (Clone: XMG1.2), TNF $\alpha$  (Clone: MP6-XT22)), Th2 (IL-4 (Clone: 11B11) , IL-5  
89 (Clone: TRFK5), IL-10 (Clone: JES5-16E3), Th17 (IL-17A (Clone: TC11-18H10.1)), and Tfh  
90 (IL-21 (Clone: BL25168)) cytokine-specific antibodies (Biolegend). Labeled cells were analyzed  
91 with an Attune NxT flow cytometer (Thermo Fisher Scientific, Waltham, MA).

92

93 **Assessment of surface body temperature.** Body temperature was assessed by measuring surface  
94 body temperature with the aid of infrared thermometers [Heat spy infrared thermal imaging camera  
95 (Wahl, Culver City, CA)].

96

97 **Measure of cytokines/chemokines in bronchoalveolar lavages.** Bronchoalveolar lavage fluids  
98 were obtained via cannulation of exposed trachea by infusion of 1 mL of sterile PBS through a 22-  
99 gauge catheter into the lungs, followed by aspiration of this fluid into a syringe. Aliquots were  
100 centrifuged and supernatants were collected and stored at -80°C until analysis. The concentrations  
101 of cytokines and chemokines in BALF were evaluated by multiplex assay using the Mouse  
102 Cytokine 23-plex Panel (Bio-Rad, Hercules, CA).

103

104 **Analysis of immune cell subset by flow cytometry.** Single-cell suspensions of spleens, lungs,  
105 Peyer's patches (PP), or mesenteric lymph nodes (MLN) were stained with fluorescent antibodies  
106 directed against the following lineage-specific markers: CD3 (clone: 17A2), CD4 (clone:  
107 BL25168), CD8 (clone: 53-6.7), CD19 (clone: 6D5), F4/80 (clone: BM8), c-kit (clone: BL2B8),  
108 Gr1 (clone: 1A8), CD11b (clone: M1/70), and CD11c (clone: N418) (Biolegend, San Diego, CA).  
109 In selected experiments, cells were also stained with anti-CD38 (clone: 90) or anti-IgA (clone:  
110 mA-6E1) (DB Biosciences, San Jose, CA). Labeled cells were analyzed with an Attune NxT flow  
111 cytometer (Thermo Fisher Scientific, Waltham, MA).

112

113 **Analysis of lung inflammation and mucus production.** Lung tissues were formalin-fixed and  
114 paraffin-embedded. Sections (5 µm thick) were stained with eosin and hematoxylin (H&E) to  
115 assess overall structure. Mucus production was visualized by staining with periodic acid-Schiff  
116 (PAS) and quantified with the aid of ImageJ software (NIH, Bethesda, MD).

117

118 **Immunohistochemistry analysis of gut tissues.** Gut tissues were formalin-fixed and paraffin-  
119 embedded. Sections (5  $\mu$ m thick) were stained with eosin and hematoxylin (H&E) to assess overall  
120 structure. Tissues were stained with the following antibodies: anti-NRF-2 (clone: A-10, dilution  
121 1:100) (Santa Cruz Biotech, Dallas, TX), anti-PGE<sub>2</sub> (goat polyclonal anti-PGE<sub>2</sub>, dilution 1:100),  
122 or anti-BAFF (goat polyclonal anti-mouse BAFF, dilution 1:100) (Abcam, Cambridge, MA).  
123 Nuclei were counterstained with DAPI. Expression of the target molecules was quantified with the  
124 aid of ImageJ software (NIH, Bethesda, MD).

125

126 **Evaluation of intestinal permeability.** For evaluation of intestinal permeability, mice were  
127 deprived of food and water for 2 h and orally administered 200  $\mu$ L PBS containing 8 mg/20 g of  
128 body weight FITC-dextran (4000; FD4, Sigma-Aldrich, Saint Louis, MO). Blood was collected 4  
129 h later, and serum FITC-dextran levels were measured with a Victor V multi-parameter plate  
130 reader (Perkin Elmer, Waltham, MA) and quantified using extrapolation against a known-  
131 concentration FITC-dextran standard.

132

133 **Real-time RT- PCR.** Tissues were collected, snap frozen, and reduced to powder before adding  
134 TRIzol (Invitrogen, Carlsbad, CA). Complementary DNA was synthesized using Superscript III  
135 (Invitrogen). Real-time PCR was performed as previously described (4) and data were expressed  
136 as relative mRNA expression =  $2^{-\Delta\Delta C_t}$  where  $\Delta C_t = C_{t_{\text{unknown}}} - C_{t_{\text{HKG}}}$ , and normalized against two  
137 house-keeping genes (HKG):  $\beta$ -actin and HPRT1. The list and sequence of primers are provided  
138 in Table S1.

139

140 **Quantification of fecal IgA.** For assessment of IgA levels in the intestinal secretions, freshly  
141 emitted fecal pellets from Cd-treated and control mice were dissolved in PBS (1 mL per 0.1 g  
142 feces). Concentration of IgA was measured by ELISA using extrapolation against IgA standards  
143 and normalized by protein content (4).

144

145 **Culture of gut microbes and 16 rRNA analysis of gut microbiota.** Freshly emitted fecal pellets  
146 were collected and normalized by mass (g) of feces. To determine the bacterial load, dilutions of  
147 fecal extracts were plated in blood agar and bacteria CFU were counted after 48 h of culture. To  
148 determine fungal (*Candida*) load, dilutions of fecal pellet were plated on Sabouraud dextrose agar  
149 containing 50 µg/mL of gentamycin and 50 µg/mL of chloramphenicol, and fungal CFU were  
150 counted after 24 h of culture. Bacterial tag-encoded FLX amplicon pyrosequencing (Roche,  
151 Branford, CT) was used for identification of primary populations of microbes in fecal pellets as  
152 previously described(4). Samples were collected twice a day from each individual mouse and  
153 pooled to minimize potential daily variation of the microbiota.

154 Bacterial DNA was extracted by conventional methods (Qiagen, Valencia, CA), and 16S  
155 rRNA genes were amplified with the modified 16S eubacterial primers 28F, 5'-GAG TTT GAT  
156 CNT GGC TCA G-3' and 519R, 5'-GTN TTA CNG CGG CKG CTG-3' for amplifying the 500  
157 bp region of 16S rRNA genes. The primer sets used for FLX-Titanium amplicon pyrosequencing  
158 were designed with adding linker A and an 8-bp barcode sequence at the 5' end of forward primers  
159 as follow: 28F-A, 5'-CCA TCT CAT CCC TGC GTG TCT CCG ACT CAG-barcode-GAG TTT  
160 GAT CNT GGC TCA G-3'. The biotin and linker B sequence at the 5' end of reverse primer 519R-  
161 B: 5'-Biotin-CCT ATC CCC TGT GTG CCT TGG CAG TCT CAG GTN TTA CNG CGG CKG  
162 CTG-3'. HotStarTaq Plus Master Mix kit (QIAGEN, CA, USA) was used for PCR under the  
163 following conditions: 95°C for 5 min followed by 35 cycles of 95°C for 30 s, 54°C for 40 s, and

164 72°C for 1 min, and a final elongation step at 72°C for 10 min was also included. The PCR products  
165 were cleaned by using Diffinity Rapid Tip (Diffinity Genomics, Inc, West Henrietta, NY), and the  
166 small fragments were removed using Agencourt Ampure Beads (Beckman Coulter, CA, USA).

167 Bacterial tag-encoded FLX-Titanium amplicon pyrosequencing (bTEFAP) was performed  
168 as described previously (6). In preparation for FLX-Titanium sequencing (Roche, Nutley, New  
169 Jersey), DNA fragment sizes and concentration were accurately measured using DNA chips under  
170 a Bio-Rad Experion Automated Electrophoresis Station (Bio-Rad Laboratories, CA, USA) and a  
171 TBS-380 Fluorometer (Turner Biosystems, CA, USA). A sample of double-stranded DNA ( $9.6 \times$   
172  $10^6$  molecules/mL) with an average size of 625 bp were combined with  $9.6 \times 10^6$  DNA capture  
173 beads and then amplified by emulsion PCR. After bead recovery and bead enrichment, the bead  
174 attached DNAs were denatured with NaOH, and sequencing primers (Roche) were annealed. A  
175 four-region, 454-sequencing run was performed on a GS PicoTiterPlate (PTP) using the Genome  
176 Sequencer FLX System (Roche). Forty tags were used on each quarter region of the PTP. All FLX  
177 procedures were performed using Genome Sequencer FLX System manufacturer's instructions  
178 (Roche). After denoising (USEARCH application) and chimera removal (UCHIIME in *de novo*  
179 mode), the sequences were clustered into operational taxonomic units (OTU) with 96.5% identity  
180 (3.5% divergence) using USEARCH, and the seed sequence was put into a FASTA-formatted  
181 sequence file. The FASTA files were then queried against a database of high-quality sequences  
182 derived from NCBI using a distributed .NET algorithm that utilizes BLASTN+ (KrakenBLAST  
183 [www.krakenblast.com](http://www.krakenblast.com)).

184 The Bray-Curtis index and principal component analysis (PCA) was used to summarize the  
185 relationship between microbial communities in the control and Cd-treatment groups. Linear  
186 discriminant analysis (LDA) scores were analyzed using the Galaxy software



187 (<https://huttenhower.sph.harvard.edu/galaxy/>) and the threshold on the logarithmic for  
188 discriminative features was set at >2.5.

189

190 **Analysis of metabolites in fecal samples.** Metabolites were analyzed using an adaptation of a  
191 previously reported methods (7). Briefly, bacteria-free fecal extracts were mixed with an equal  
192 volume of ethyl acetate and centrifuged at  $13,000 \times g$  for 15 min. The upper organic layer was  
193 diluted by a factor of 10 into H<sub>2</sub>O: ACN with 0.1% formic acid and placed into LC vials for HPLC  
194 MS analysis (7). Samples (6.4  $\mu$ L) were injected into the UltiMate 3000 HPLC (Thermo Fisher  
195 scientific, Waltham, MA) with an Intakt Scherzo SM-C18 column (100 mm  $\times$  1 mm, 3- $\mu$ m  
196 particle size). Two mobile-phase systems consisting of H<sub>2</sub>O with 0.1% formic acid (Solvent A)  
197 and 70:30 ACN: H<sub>2</sub>O with 0.5% formic acid (Solvent B) were used. A flow rate of 20  $\mu$ L/min with  
198 a column temperature of 55°C at linear gradients from 5% to 90% for 13 min and 90% to 95% for  
199 2 min (15 min total) was used before equilibration. Both positive and negative mode runs were run  
200 separately with the heated electrospray ionization (HESI) source on the Q Exactive Plus Hybrid  
201 Quadrupole-Orbitrap Mass Spectrometer (Thermo Fisher scientific). The HESI source was set to  
202 a capillary voltage of 3.2 kV with a capillary temperature of 320°C and sheath gas of 7 and  
203 auxiliary gas of 1.2. Metabolites that showed significance ( $P < 0.05$ , t-test) between the control  
204 (NoCd) and at least one of the Cd-treated groups were further categorized with the aid of the  
205 Human Metabolome Database (HMDB Version 4.0, [www.hmdb.ca](http://www.hmdb.ca))

206

207 **Proteomic analysis of fecal samples.** For proteomic analysis, proteins were precipitated by  
208 adding 1 volume trichloroacetic acid to 4 volumes of fecal extracts followed by 60 min incubation  
209 on ice. The pellets were washed in cold acetone and then resuspended in 50 mM ammonium  
210 bicarbonate. Protein concentrations were normalized before sequential addition of 5 mM di-

211 thiothreitol (DTT) and 15 mM iodoacetamide (IAA) to reduce disulfide bonds and alkylate-free  
212 cysteine residues. Samples were then trypsin digested (1:30 trypsin:protein) overnight at 37°C.  
213 Trifluoroacetic acid (0.5% TFA) was added to stop the digestion. The samples were then  
214 centrifuged and the supernatant was removed, then the pellets were dried and resuspended in 50  
215 mM acetic acid before analysis.

216 Liquid chromatography-nanospray tandem mass spectrometry (LC/MS/MS) of protein  
217 identification was performed on a Thermo Scientific orbitrap Fusion mass spectrometer equipped  
218 with an EASY-Spray Sources operated in positive ion mode. Samples were separated on an EASY-  
219 Spray nano column (Pepmap™ RSLC, C18 3 μ 100 A, 75 μm × 150 mm, Thermo Scientific) using  
220 a 2D RSLC HPLC system from Thermo Scientific. Next, 3 μg of each sample were injected into  
221 the μ-Precolumn Cartridge (Thermo Scientific,) and desalted with 0.1% formic acid in water for 5  
222 min. The injector port was then switched to inject, and the peptides were eluted off the trap into  
223 the column. Mobile phase A was 0.1% formic acid in water, and acetonitrile (with 0.1% formic  
224 acid) was used as mobile phase B. Flow rate was set at 300 nL/min. Mobile phase B was increased  
225 from 2% to 35% in 80 min, then increased from 35–55% in 10 min, increased again from 55–90%  
226 in 5 min, and then kept at 90% for another 4 min before being brought back quickly to 2% in 1  
227 min. MS/MS data was acquired with a spray voltage of 1.7 KV and a capillary temperature of  
228 275°C. The scan sequence of the mass spectrometer was based on the preview mode data  
229 dependent TopSpeed method: the analysis was programmed for a full scan recorded between 400–  
230 1,600 m/z and a MS/MS scan to generate product ion spectra to determine amino acid sequences  
231 in consecutive scans starting from the most abundant peaks in the spectrum within the next 3 s. To  
232 achieve high mass accuracy MS determination, the full scan was performed at Fourier transform  
233 (FT) mode and the resolution was set at 120,000. The automatic gain control (AGC) target ion  
234 number for FT full scan was set to  $2 \times 10^5$  ions, maximum ion injection time was set to 50 ms, and

235 the micro scan number was set to 1. MS/MS was performed using ion trap mode to ensure the  
236 highest signal intensity of MS/MS spectra using both collision-induced dissociation [(CID) 2+ to  
237 4+ charges] and electron-transfer dissociation [(ETD) 4+ to 6+ charges] methods. The AGC target  
238 ion number for ion trap MS/MS scan was set to 1,000 ions, maximum ion injection time was set  
239 to 100 ms, and the micro scan number was set to 1. The CID fragmentation energy was set to 35%.  
240 Dynamic exclusion was enabled with a repeat count of 2 within 40 s and a low mass width and  
241 high mass width of 10 ppm.

242 Data analysis was performed using Mascot 2.6.0. The fragmentation spectra were searched  
243 against the UniProt *Rattus* protein database with precursor and fragment mass tolerances set to 10  
244 ppm and 0.5 Da, respectively, and with up to four missed cleavages. Cysteine  
245 carbamidomethylation was set as a fixed modification, whereas methionine oxidation and  
246 deamidation of asparagine and glutamine were set as variable modifications for database  
247 searching. Data were filtered to enable only proteins for which two unique peptides to be  
248 considered, along with high confidence identifications [1% false discovery rate (FDR)]. Search  
249 results were compiled in Scaffold using a 1% FDR for proteins and enabling comparison between  
250 samples.

251  
252 **Fecal material transplant.** Fecal microbiomes were transferred to naïve mice prior to allergic  
253 sensitization as previously described (4). Briefly, freshly emitted feces were collected and  
254 dissolved in PBS (1 mL/0.1 g feces). Particles were removed by filtration using a 70- $\mu$ m strainer,  
255 and mice received 0.2 mL suspension by gavage.

256  
257 ***In vitro* culture with bacteria-free fecal material extracts.** J774 (origin: Balb/c), wild-type  
258 C57BL/6, Myd88 KO C57BL/6 or Trif/Tram double-KO C57BL/6 macrophages (BEI resources,

259 Manassas, VA), and HT-29 human epithelial cells were cultured in the presence of 1:50 dilutions  
260 of 0.1- $\mu$ m filtered bacteria-free fecal material extracts from control (NoCd) or Cd-treated mice  
261 (Cd10 or Cd25), and then concentration of PGE<sub>2</sub> or mRNA expressions were analyzed by ELISA  
262 or RT-PCR. To assess the effect of bacteria-free fecal material extracts on IgE production *in vitro*,  
263 spleen or mesenteric lymph node cells ( $4 \times 10^5$  cells) from naïve mice were cultured for 4 days in  
264 the presence of IL-4 (10 ng/mL), anti-CD40 (1  $\mu$ g/mL), and bacteria-free fecal material extracts  
265 (dilution 1:50) from control or Cd-treated mice. In selected experiments, the COX2-inhibitor  
266 celecoxib (Sigma-Aldrich, Saint Louis, MO) was added at a final concentration of 10  $\mu$ M. These  
267 stimulated cells were assessed Ig-class switching by flow cytometry or ELISA.

268

269 **Measure of PGE<sub>2</sub>.** The concentrations of PGE<sub>2</sub> in fecal materials and culture supernatants were  
270 evaluated by competitive ELISA using a Prostaglandin E<sub>2</sub> Parameter Assay kit (R&D Systems,  
271 MN).

272

273 ***In vivo* treatment with pharmacological inhibitors of specific pathways.** To address the role of  
274 oxidative stress, PGE<sub>2</sub> and Vitamin D<sub>3</sub>-metabolizing enzymes, mice received orally by intragastric  
275 gavage 250  $\mu$ L of saline containing 250 mg/kg of N-acetyl L-cysteine (Sigma-Aldrich, Saint  
276 Louis, MO), 25 mg/kg of aspirin (Sigma-Aldrich, Saint Louis, MO), or 10 mg/kg of ketoconazole  
277 (Sigma-Aldrich, Saint Louis, MO), respectively.

278

279 **Statistical analyses.** Results are expressed as mean  $\pm$  SD. Statistical significance was determined  
280 by one- or two-way ANOVA, followed by the Tukey's multiple range test. All statistical analyses  
281 were performed with the StataSE 12.0 software (StataCorp LLC, College Station, TX) and Prism  
282 7 software (GraphPad Software, La Jolla, CA).

283 **Table S1.** List of primers used for real-time RT-PCR

| Species        |                          | Name                   |                             | Sequence                        | Size                       |     |
|----------------|--------------------------|------------------------|-----------------------------|---------------------------------|----------------------------|-----|
| Mouse          | House keeping gene (HKG) | <i>β-actin</i>         | F                           | GCG CAA GTA CTC TGT GTG GA      | 162                        |     |
|                |                          |                        | R                           | GAA AGG GTG TAA AAC GCA GC      |                            |     |
|                |                          | <i>Hprt1</i>           | F                           | GAGGAGTCCTGTTGATGTTGCCAG        | 173                        |     |
|                |                          |                        | R                           | GGCTGGCCTATAGGCTCATAGTGC        |                            |     |
|                | Dual oxidase             | <i>Duox1</i>           | F                           | CCC ACG TTA CCA TTT CCA TCA     | 204                        |     |
|                |                          |                        | R                           | CAT CTG CAT AGC TGG CTG GA      |                            |     |
|                |                          | <i>Duox2</i>           | F                           | GGA CAG CAT GCT TCC AAC AAG T   | 222                        |     |
|                |                          |                        | R                           | GCC TGA TAA ACA CCG TCA GCA     |                            |     |
|                |                          | <i>Duoxa1</i>          | F                           | CAT CAC CCT CAC AGG CAC C       | 239                        |     |
|                |                          |                        | R                           | GGA ATG CCA CCC ACA GCA         |                            |     |
|                |                          | <i>Duoxa2</i>          | F                           | GCC TGG CTT TGC TCA CCA         | 170                        |     |
|                |                          |                        | R                           | GAG GAG GAG GCT CAG GAT         |                            |     |
|                |                          | Inflammatory cytokines | <i>Ifnγ</i>                 | F                               | ACT GGC AAA AGG ATG GTG AC | 237 |
|                |                          |                        |                             | R                               | TGA GCT CAT TGA ATG CTT GG |     |
|                | <i>Tnfa</i>              |                        | F                           | CTC TTC AAG GGA CAA GGC TG      | 253                        |     |
|                |                          |                        | R                           | CGG ACT CCG CAA AGT CTA AG      |                            |     |
|                | <i>Il-1β</i>             |                        | F                           | TCG CAG CAG CAC ATC AAC AAG     | 190                        |     |
|                |                          |                        | R                           | CCA GCA GGT TAT CAT CAT CAT CC  |                            |     |
|                | <i>Caspase-1</i>         |                        | F                           | CCA ATA ATG AAT ACA ACC ACT CG  | 125                        |     |
|                |                          |                        | R                           | TCC TCC AGC AGC AAC TTC         |                            |     |
|                | <i>Tgfb</i>              |                        | F                           | CCC TAT ATT TGG AGC CTG GA      | 141                        |     |
|                |                          |                        | R                           | CTT GCG ACC CAC GTA GTA GA      |                            |     |
|                | <i>Il-10</i>             |                        | F                           | GCA CTA CCA AAG CCA CAA AGC AG  | 88                         |     |
|                |                          |                        | R                           | GTC AGT AAG AGC AGG CAG CAT AGC |                            |     |
|                | <i>Kc</i>                |                        | F                           | ACT CAA GAA TGG TCG CGA GG      | 123                        |     |
|                |                          |                        | R                           | GTG CCA TCA GAG CAG TCT GT      |                            |     |
|                | <i>Mip2</i>              | F                      | CCT CAA CGG AAG AAC CAA AG  | 70                              |                            |     |
|                |                          | R                      | ACA TCA GGT ACG ATC CAG GC  |                                 |                            |     |
|                | Ig-Class switching       | <i>April</i>           | F                           | GGG GAA GGA GTG TCA GAG TG      | 148                        |     |
|                |                          |                        | R                           | GCA GGG AGG GTG GGA ATA C       |                            |     |
|                |                          | <i>Baff</i>            | F                           | AGG CTG GAA GAA GGA GAT GAG     | 161                        |     |
|                |                          |                        | R                           | CAG AGA AGA CGA GGG AAG GG      |                            |     |
|                |                          | <i>Ptges</i>           | F                           | AAG CCT AGC CAC ACC ACT TC      | 100                        |     |
|                |                          |                        | R                           | CCA GCA GGG CTT TCC AGT AA      |                            |     |
|                | Vitamin D metabolism     | <i>Vdr</i>             | F                           | CAC TGC TGC CTC TGA GAA CA      | 168                        |     |
|                |                          |                        | R                           | ATA ATA CAG ACA GGT GGC AGG AG  |                            |     |
| <i>Cyp24a1</i> |                          | F                      | ACG TCA CCT CCT TAC CTG GA  | 165                             |                            |     |
|                |                          | R                      | GAT GCA CCG AGT CGA AGG AG  |                                 |                            |     |
| <i>Cyp27b1</i> |                          | F                      | AAG CTC GCC TCC AGA GTT TTT | 88                              |                            |     |
|                |                          | R                      | GGA GAA CCG ACT CAC TGC C   |                                 |                            |     |
| Human          | HKG                      | <i>β-ACTIN</i>         | F                           | TGG GCA TGG GTC AGA AGG AT      | 84                         |     |
|                |                          |                        | R                           | GCT CGA TGG GGT ACT TCA GG      |                            |     |
|                | Ig-Class switching       | <i>APRIL</i>           | F                           | AGT CTC CCG GAG CAG AGT TC      | 103                        |     |
|                |                          |                        | R                           | CGG AGT CAT TCT TCT GTT TTT GGG |                            |     |
|                |                          | <i>C4BP</i>            | F                           | GCT TCT CAC TCT TGG GCC AT      | 216                        |     |
|                |                          |                        | R                           | CAC TGC TGC CTC TGA GAA CA      |                            |     |

285 Table S2. Metabolites and proteins/peptides most affected by ingestion of Cadmium

|                                                           | No Cd         | Cd 10             |
|-----------------------------------------------------------|---------------|-------------------|
| 24,25,26,27-Tetranor-23-oxo-hydroxyvitamin D <sub>3</sub> | 34.725±33.885 | 2216.896±1325.511 |
| Kallikrein-1                                              | 416.5±13.435  | 238.5±44.548      |
| Mucin-3                                                   | 3.5±4.950     | 0±0               |
| Mucin-6                                                   | 21±2.828      | 12.5±0.707        |
| Alkaline phosphatase                                      | 167±82.024    | 106±5.657         |
| Aminopeptidase N                                          | 685±57.983    | 580±4.95          |
| Sucrase isomaltase                                        | 266±16.971    | 226±8.485         |
| Ferritin                                                  | 2±2.828       | 4.5±0.707         |
| Ferritin heavy chain                                      | 5.5±0.707     | 9.5±3.536         |
| Ig heavy constant alpha                                   | 284.5±45.962  | 266.5±10.607      |

286

287 Metabolites and proteins/peptides present in fecal extracts were analyzed by HPLC-MS. The  
 288 amounts of product detected were expressed as mean arbitrary unit (AU) ± one S.D.

289 Note: Fecal materials of mice exposed to Cd 25 contained 1673.890±631.856 AU of 24,25,26,27-  
 290 Tetranor-23-oxo-hydroxyvitamin D<sub>3</sub>.

291

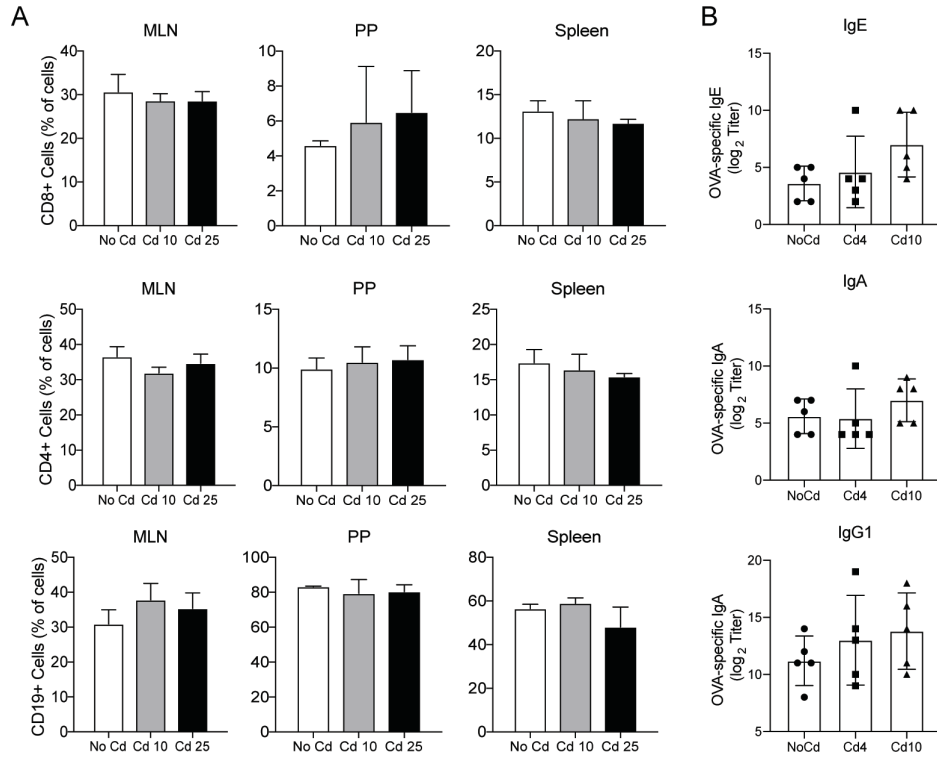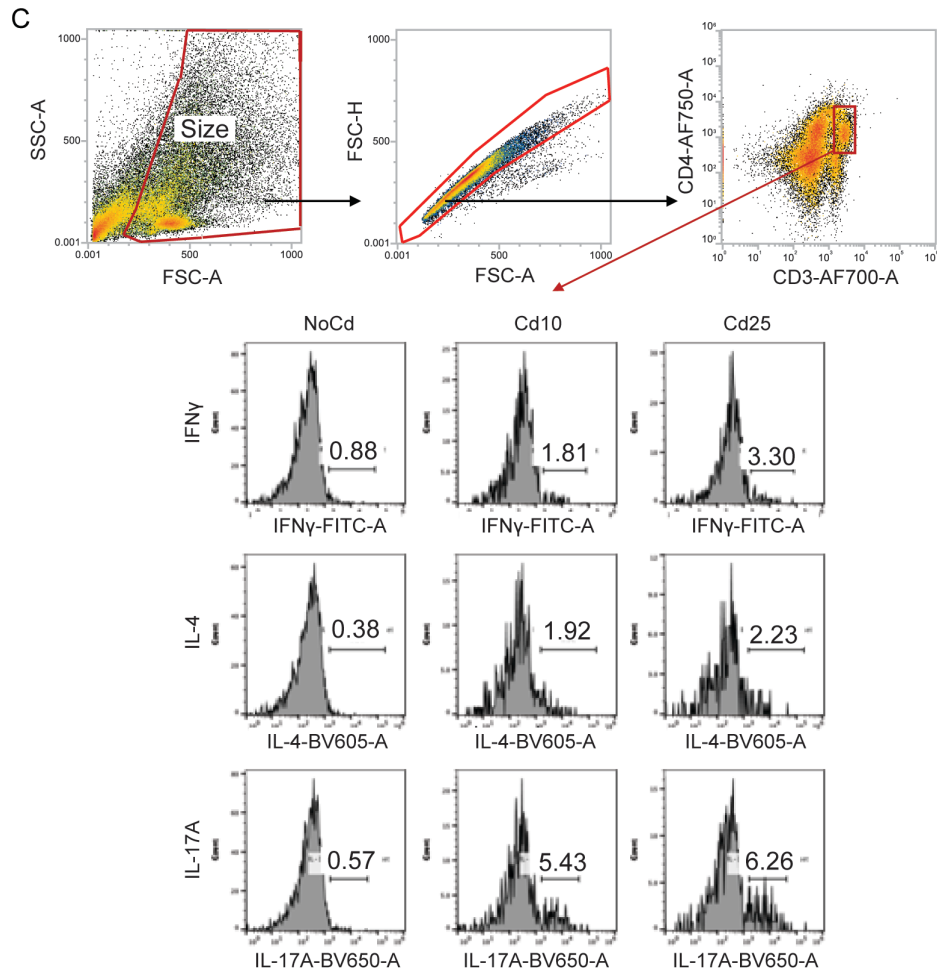

293 **Figure S1. Chronic exposure to subtoxic doses of cadmium does not affect the**  
294 **frequencies of major immune cell subsets in mucosal and systemic lymphoid tissues.** (A)  
295 Mice were provided CdCl<sub>2</sub> [10 μM (Cd10) or 25 μM (Cd25)] in drinking water for 28 days. Cells  
296 were then isolated from mesenteric lymph nodes (MLN), Peyer's patches (PP) and spleens and  
297 analyzed by flow cytometry after staining with lineage-specific fluorescent antibodies. (B) OVA-  
298 specific antibody responses from mice exposed CdCl<sub>2</sub> [4 μM (Cd4) or 10 μM (Cd10)] in  
299 drinking water for 28 days. After exposed to Cd, mice were sensitized with OVA and CT and  
300 serum were collected at day 14. (C) Representative flow gating strategy for intracellular  
301 cytokines. Spleens were collected on day 14 and restimulated *in vitro* with 1 mg/mL of OVA  
302 before flow cytometry analysis of CD4<sup>+</sup> T cell cytokine responses. Results are expressed as  
303 mean ± SD. (n = 5 per group).

304

305

306

307

308



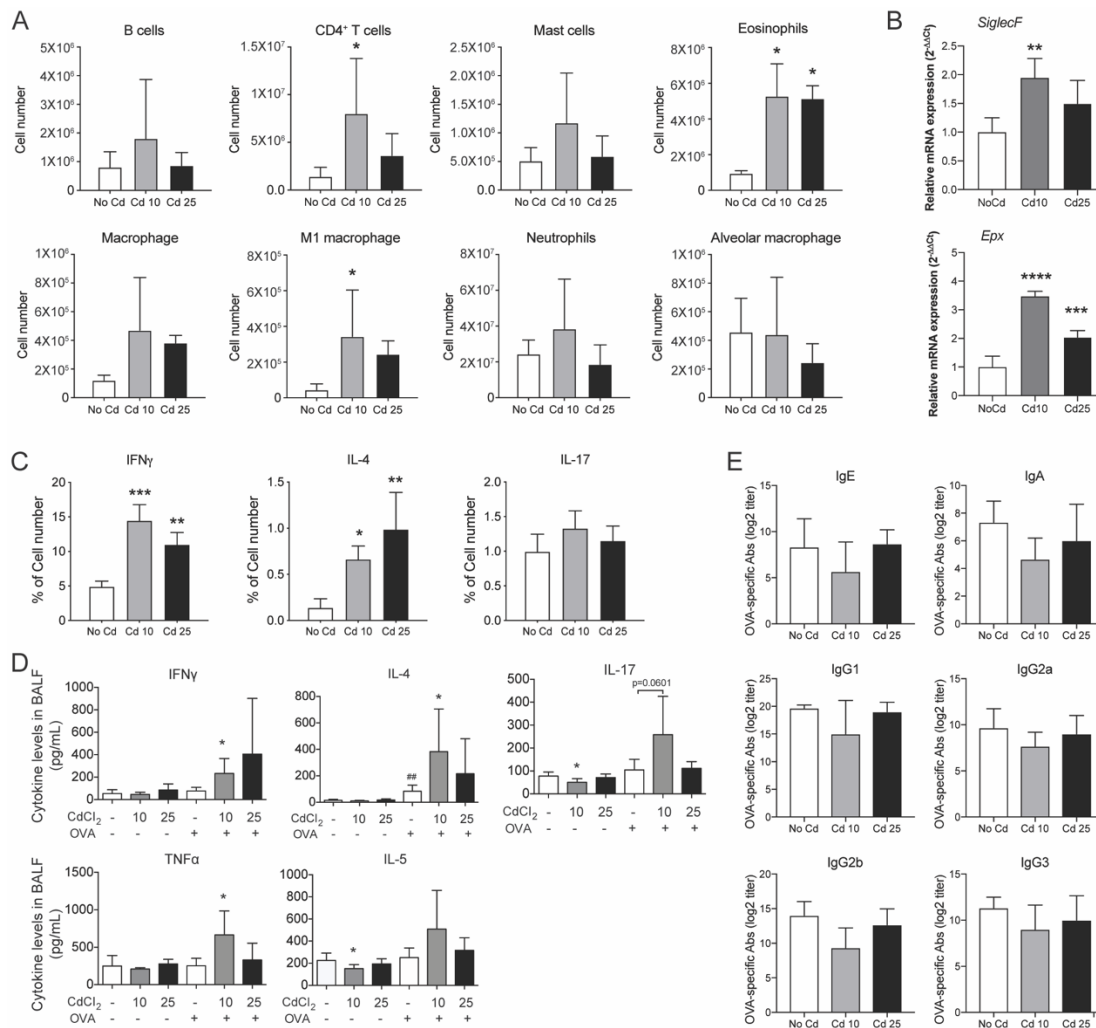

309

310 **Figure S2. Immune cell subset, cytokine and antibody responses in mice chronically exposed**

311 **to subtoxic doses of cadmium.** (A-D) Immune cell subsets, cytokines responses in the lungs after

312 nasal allergen challenges of mice orally sensitized to allergen. (A) Immune cell subsets present in

313 bronchoalveolar lavage fluid (BALF) after allergen challenges were analyzed by flow cytometry.

314 (B) Eosinophils responses in the lungs after allergen challenges were analyzed by expression of

315 *Siglec-F* and *Epx* mRNA. (C) Intracellular cytokines in BAL cells were analyzed by flow

316 cytometry (n = 5). (D) Cytokines responses in BALF were analyzed by multi-plex assay. Data

317 represent one of at least 4 experiments with n = 5 per group. (E) Antibodies (Abs) responses after

318 systemic sensitization of mice exposed to Cd. OVA-specific serum Abs responses on day 14 [after

319 2 i.p. sensitization on days 0 and 7 with OVA allergen (100  $\mu$ g) with CT (1  $\mu$ g) as adjuvant] (n=5  
320 per group). Data are expressed as mean  $\pm$  SD. \* $p$  < 0.05; \*\* $p$  < 0.01, \*\*\* $p$  < 0.001  
321

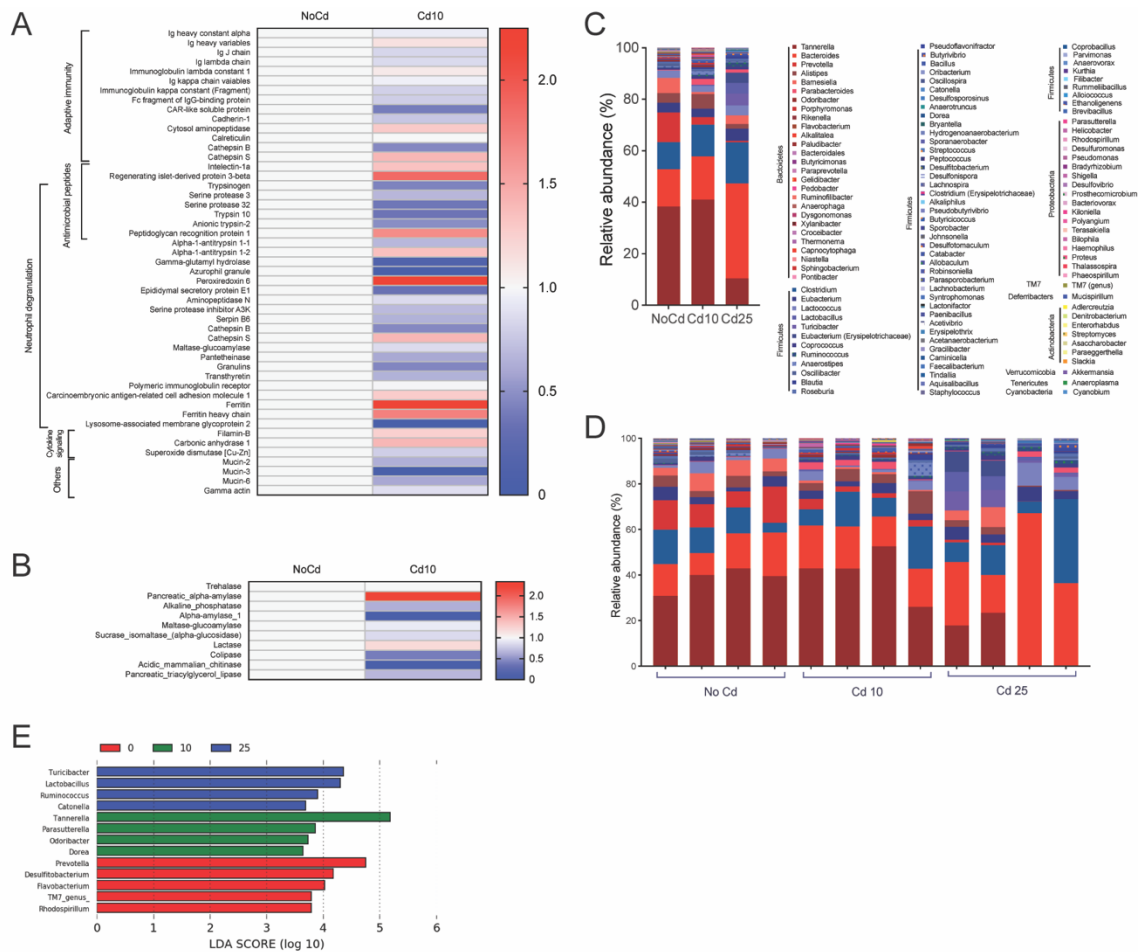

322

323 **Figure S3. Chronic ingestion of subtoxic doses of cadmium alters the gut microbiome, and**  
 324 **luminal proteomic profiles**

325 (A and B) Proteomics analysis. Freshly emitted fecal pellets were collected from mice treated with  
 326 28 days no Cd (No Cd) or subtoxic doses of Cd (Cd10 and Cd25) and dissolved in PBS (0.1 g  
 327 feces/ml PBS). Proteomics profiles were analyzed and results expressed as heat-map of mean  
 328 values showed expression of relative amount of proteins related with (A) immune responses and  
 329 (B) digestions. (C-E) Composition of microbiome at the genus levels. (C) Mean relative abundance  
 330 of bacterial genera. (D) Relative abundance of the bacterial genera in individual mice. (E) Linear  
 331 discriminant analysis (LDA) of bacterial genera. (n = 4 per group). Data are expressed as mean. (n  
 332 = 4 per group)

333

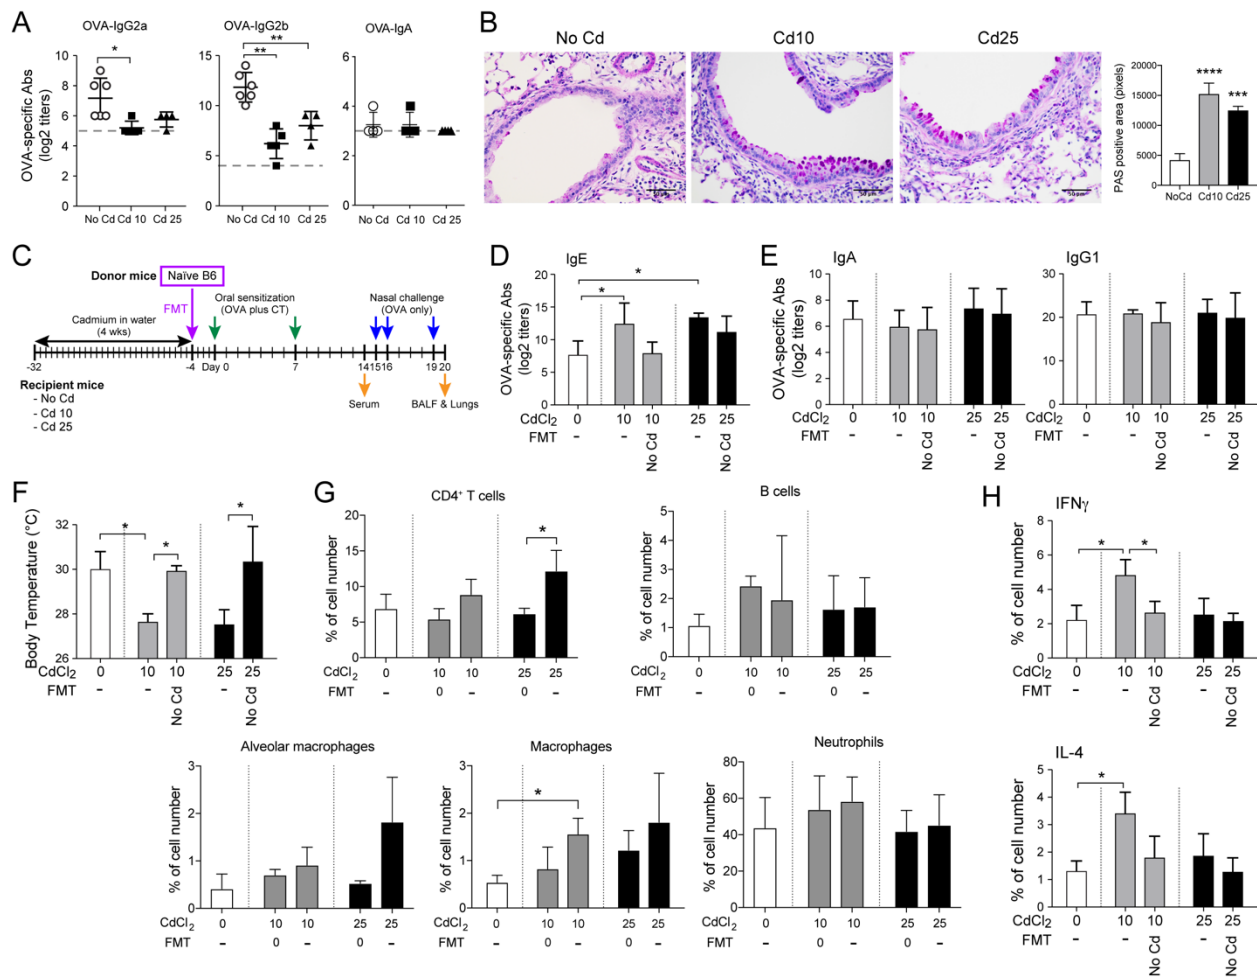

334

335 **Figure S4. Intestinal content regulates the IgE-promoting effect of Cd.**

336 (A) Allergen-specific serum IgG subclasses and IgA responses after oral sensitization of FMT  
 337 recipient mice not exposed to Cd (n = 5). (B) Representative lung histology (left panel) and Cd  
 338 quantification (right panel) of mucus production (PAS staining) after nasal allergen challenge of  
 339 orally sensitized mice. (C-H) Cd-treated [10  $\mu$ M (Cd10) or 25  $\mu$ M (Cd25)] mice were given a  
 340 single transplantation of fecal material (FMT) from naïve mice before oral sensitization (n = 5).  
 341 (C) Experimental scheme for transplantation of fecal materials from untreated mice. (D) Allergen-  
 342 specific serum IgE, (E) IgA and IgG1 responses. (F) Surface body temperature 1 h after nasal  
 343 allergen challenge. (G) Immune cell subsets present in BALF after nasal allergen challenges were

344 analyzed by flow cytometry. (H) CD4<sup>+</sup> T cell cytokine responses in BALF after nasal allergen  
345 challenges. Data are expressed as mean  $\pm$  SD (n = 5). \* $p$  < 0.05; \*\* $p$  < 0.01.

346

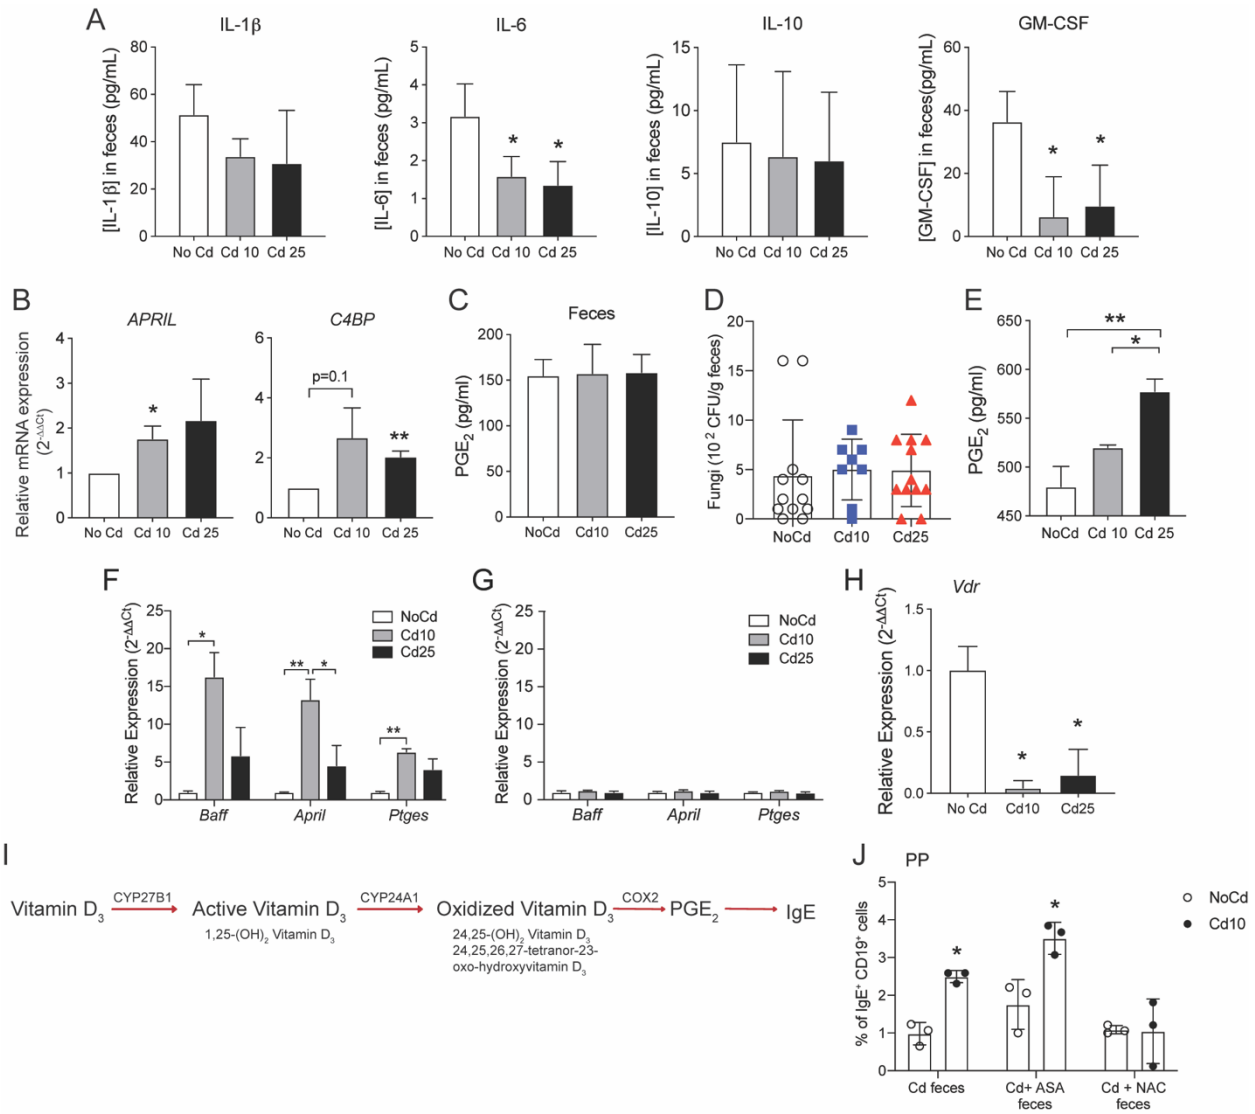

347

348 **Figure S5. Cytokines and PGE<sub>2</sub> levels in fecal extracts of cadmium-treated mice and**  
 349 **upstream and downstream signals *in vitro*.**

350 (A) Cytokines levels in bacteria-free fecal extracts were analyzed by multi-plex assay. (B)

351 Expression of *APRIL* and *C4BP* mRNA level from human intestinal epithelial cells (HT-29) were

352 analyzed after cultured with bacteria-free fecal extracts by real-time RT PCR. (C) Level of PGE<sub>2</sub>

353 in fecal extracts from Cd-ingested mice. (D) *Candida* load in fecal extracts. Dilution of fecal pellets

354 were normalized by mass (g) of feces, plated on Sabouraud dextrose agar containing 50 μg/mL

355 gentamycin and 50 μg/mL chloramphenicol, and fungal CFU were counted after 24 h culture. (E)

356 PGE<sub>2</sub> secretion by *Trif/Tram* double KO murine macrophages cultured 4 h in the presence of  
357 bacteria-free fecal extracts. (F and G) Expression of *Baff*, *April* and *Ptges* mRNA responses by  
358 splenocytes stimulated for 24 h with anti-CD40, IL-4 in the presence of bacteria-free fecal extracts  
359 only (F), or together with the COX2 inhibitor celocoxib (G). (H) Expression of *Vdr* by J774  
360 macrophage cell-line cultured 16 h in the presence of bacteria-free fecal extracts. (I) Brief  
361 summary of expected mechanism of IgE production through vitamin D<sub>3</sub> metabolism. (J) Numbers  
362 of IgE<sup>+</sup>CD19<sup>+</sup> cells in culture of payer's patch cells from Verigem IgE mice simulated *in vitro*  
363 with anti-CD40 (1 µg/mL) and IL-4 (10 ng/mL) in the presence of bacteria-free fecal extracts from  
364 mice exposed to Cd (Cd), mice exposed to Cd and treated with COX2 inhibitor (Cd + ASA), or  
365 mice exposed to Cd and treated with antioxidant after exposed to Cd (Cd + NAC) (n = 5). Data are  
366 from four independent experiments and are expressed as mean ± SD. \**p* < 0.05; \*\**p* < 0.01;  
367 \*\**p* < 0.001.

368

369

370 References

- 371 1. Augeron C, Laboisse CL. Emergence of permanently differentiated cell clones in a human  
372 colonic cancer cell line in culture after treatment with sodium butyrate. *Cancer Res.*  
373 1984;44(9):3961-9.
- 374 2. Jarup L. Hazards of heavy metal contamination. *Br Med Bull.* 2003;68:167-82.
- 375 3. Kundu S, Sengupta S, Chatterjee S, Mitra S, Bhattacharyya A. Cadmium induces lung  
376 inflammation independent of lung cell proliferation: a molecular approach. *J Inflamm (Lond).*  
377 2009;6:19.
- 378 4. Bonnegarde-Bernard A, Jee J, Fial MJ, Aeffner F, Cormet-Boyaka E, Davis IC, et al.  
379 IKKbeta in intestinal epithelial cells regulates allergen-specific IgA and allergic inflammation at  
380 distant mucosal sites. *Mucosal Immunol.* 2014;7(2):257-67.
- 381 5. Kim E, Lembert M, Fallata GM, Rowe JC, Martin TL, Satoskar AR, et al. Intestinal  
382 Epithelial Cells Regulate Gut Eotaxin Responses and Severity of Allergy. *Front Immunol.*  
383 2018;9:1692.
- 384 6. Dowd SE, Wolcott RD, Sun Y, McKeenan T, Smith E, Rhoads D. Polymicrobial nature of  
385 chronic diabetic foot ulcer biofilm infections determined using bacterial tag encoded FLX  
386 amplicon pyrosequencing (bTEFAP). *PLoS One.* 2008;3(10):e3326.
- 387 7. Huang C, Leung RK, Guo M, Tuo L, Guo L, Yew WW, et al. Genome-guided Investigation  
388 of Antibiotic Substances produced by *Allosalinactinospora lopnorenensis* CA15-2(T) from Lop Nor  
389 region, China. *Sci Rep.* 2016;6:20667.

390
